# Supplementary material for: Upconversion NaYF4:Yb:Er nanoparticles co-doped with Gd3+ and Nd3+ for thermometry on the nanoscale
Source: Royal Society of Chemistry journal article supplement (doi:10.1039/c5ra11502g), 2015-01-01
Supplement: c5ra11502g1.pdf [file c5ra11502g1.pdf]

## Supporting Information:

# Upconversion NaYF<sub>4</sub>:Yb:Er nanoparticles co-doped with Gd<sup>3+</sup> and Nd<sup>3+</sup> for thermometry on nanoscales

Dennis T. Klier and Michael U. Kumke<sup>#</sup>

*University of Potsdam, Department of Chemistry (Physical Chemistry), Karl-Liebknecht-Str. 24-25, 14476 Potsdam, Germany*

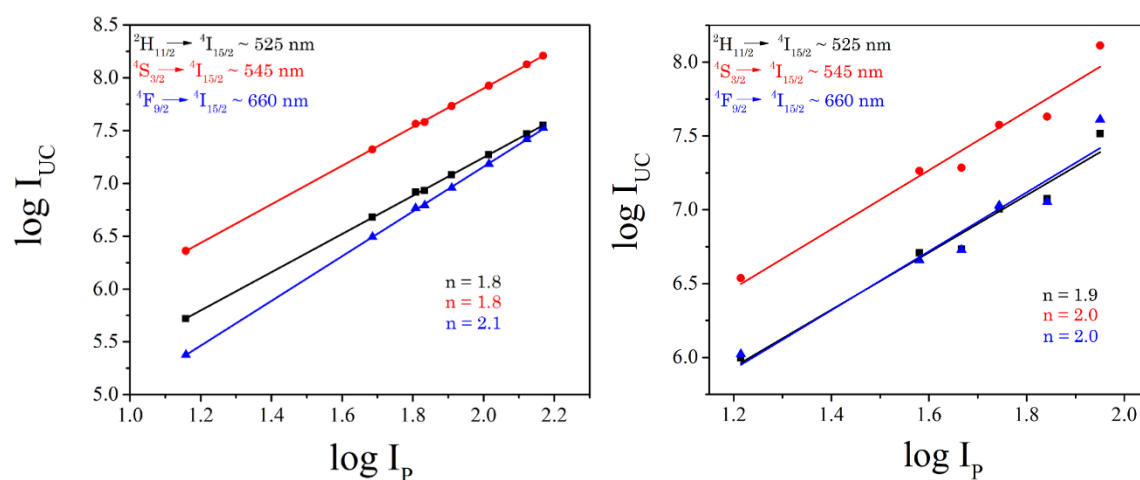

SI.Fig.1: Power dependence ( $\log I_{UC} - \log I_P$  plot) of the Er<sup>3+</sup> transitions G1, G2 and R of oleic acid capped UCNPs using different excitation wavelength (left:  $\lambda_{ex} = 976$  nm; right:  $\lambda_{ex} = 795$  nm).

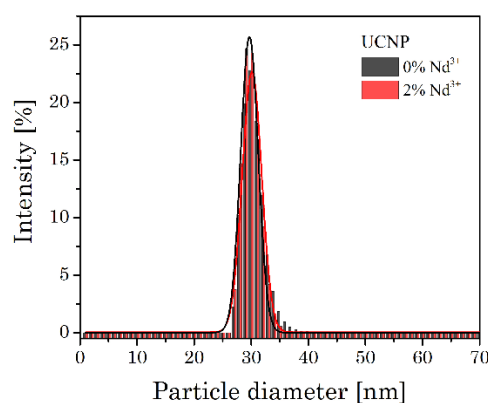

SI.Fig.2: DLS analysis of UCNPs and UCNPs<sub>Nd</sub> fitted using a Gaussian function.

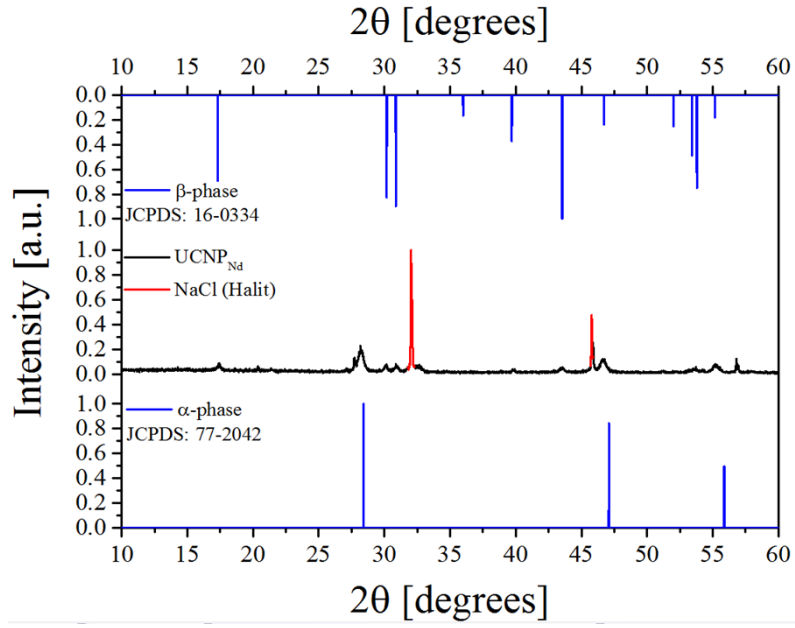

SI.Fig.3: Diffractogram of  $\text{UCNP}_{\text{Nd}}$  with the reference data of  $\alpha\text{-NaYF}_4$  (JCPDS:77-2042) and  $\beta\text{-NaYF}_4$  (JCPDS:16-0334) [39].

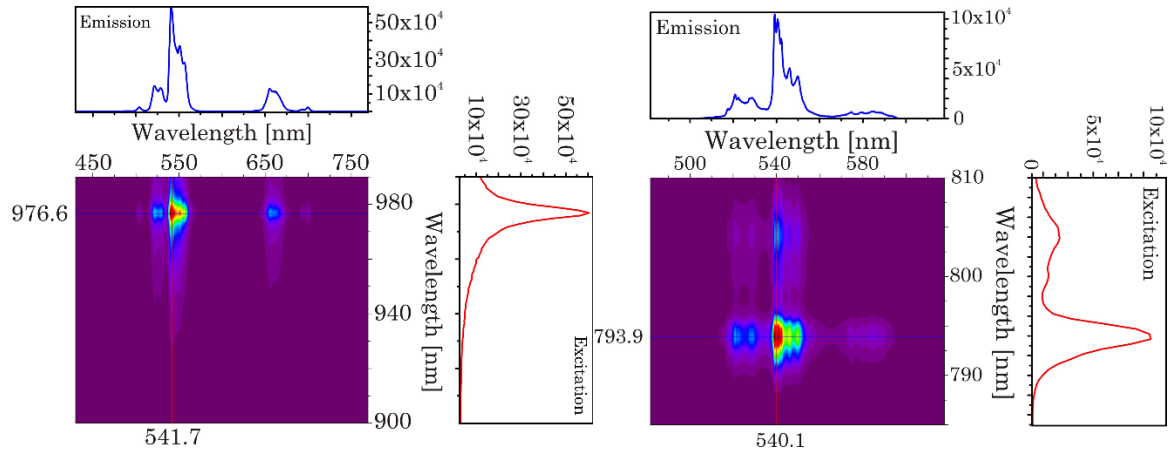

SI.Fig.4: Excitation emission spectra (total luminescence spectra) of  $\text{UCNP}$  and  $\text{UCNP}_{\text{Nd}}$ .

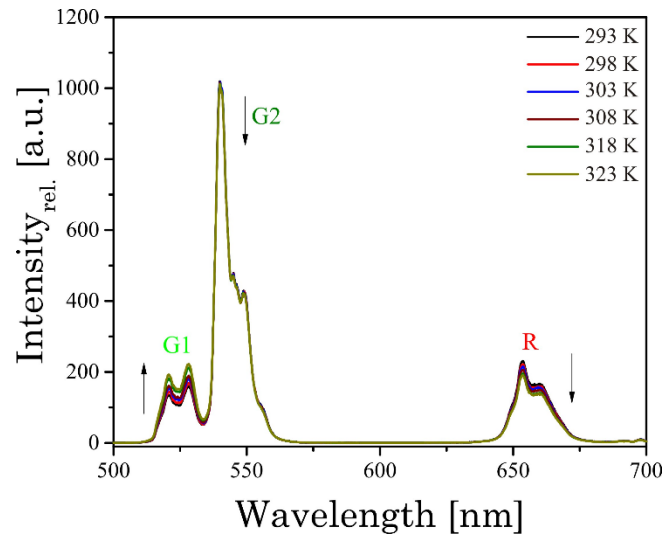

SI.Fig.5: Upconversion emission spectra of UCNP excited at  $\lambda_{\text{ex}} = 976 \text{ nm}$  at temperatures between 293 K and 323K are shown.

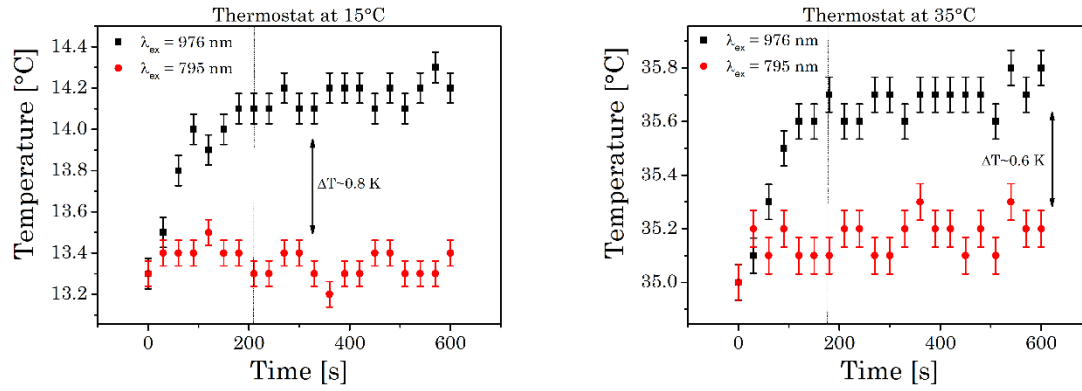

SI.Fig.6: Temperature dependence of UCNP<sub>Nd</sub> dissolved in water at different irradiation wavelength and thermostat temperature over time.
